# Supplementary material
Source: publisher figshare collection journal article supplement (https://acs.figshare.com/ndownloader/files/12333401)
Supplement: Supplementary file 1 [file 12333401]

*Supporting Information for*

**An Air-Stable Organoboron Compound,**

**Dithienooxadiborepine: Preparation and Functionalization**

*Qifan Yan, \* Mengxuan Yin, Cheng Chen, Yuankun Zhang*

*Key Laboratory for Advanced Materials, School of Chemistry and Molecular  
Engineering, East China University of Science and Technology, Shanghai 200237, P.*

*R. China*

E-mail: yanqifan@ecust.edu.cn

**Table of Contents**

|                                                            |            |
|------------------------------------------------------------|------------|
| <b>I. Synthetic Trials</b>                                 | <b>S2</b>  |
| <b>II. X-Ray Crystallography</b>                           | <b>S3</b>  |
| <b>III. Photophysical and Electrochemical Measurements</b> | <b>S7</b>  |
| <b>IV. DFT Calculations</b>                                | <b>S10</b> |
| <b>NMR Charts</b>                                          | <b>S19</b> |
| <b>Mass Spectra</b>                                        | <b>S32</b> |
| <b>References</b>                                          | <b>S34</b> |

## I. Synthetic Trials

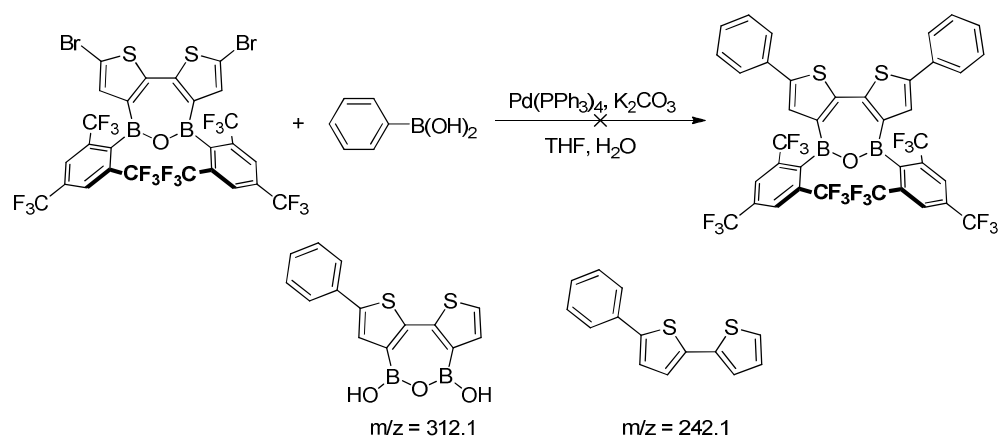

**Trial of Suzuki reaction.** No desired product was found in the reaction mixture. In the mass spectrum of crude reaction mixture, peaks at  $m/z = 312.1$  and  $242.1$  were observed. Fragmented structures with such  $m/z$  values were proposed.

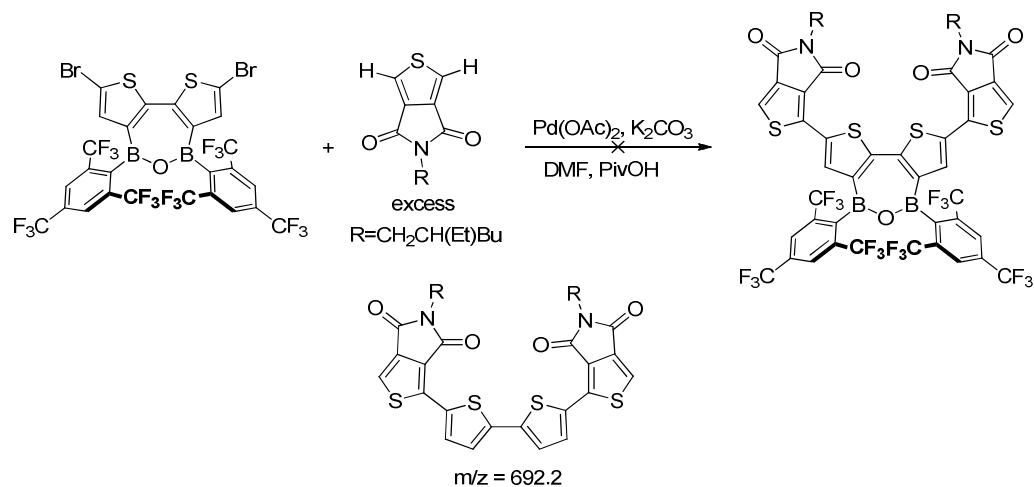

**Trial of C-H arylation.** No desired product was found in the reaction mixture. In the mass spectrum of crude reaction mixture, a peak at  $m/z = 692.2$  was observed. Fragmented structure with such  $m/z$  values was proposed.

## II. X-Ray Crystallography

Single crystals of **4**, **5A** and **5B** suitable for X-ray crystal analysis were obtained by slowly evaporation of their solution in ethyl acetate, petroleum ether, and DCM/heptane, respectively. Diffraction data of **4**, **5A** and **5B** were collected at 296 K, 173 K, and 173 K, respectively, on a Bruker SMART APEX single crystal CDD X-ray diffractometer with Mo K $\alpha$  radiation ( $\lambda = 0.71073$  Å). The crystal data for these compounds are summarized in Table S1. The structures were solved with the SHELX-97 program and refined by the full-matrix least-squares on  $F^2$ . Crystallographic data for the structures of **4**, **5A**, and **5B** have been deposited with the Cambridge Crystallographic Data Center as supplementary publication CCDC1826019, 1826020, and 1826021, respectively.

**Table S1.** Crystal structure and refinement data for **4**, **5A**, and **5B**.

| Compound                                   | <b>4</b>                                                                                      | <b>5A</b>                                                                      | <b>5B</b>                                                                      |
|--------------------------------------------|-----------------------------------------------------------------------------------------------|--------------------------------------------------------------------------------|--------------------------------------------------------------------------------|
| Formula                                    | C <sub>26</sub> H <sub>6</sub> B <sub>2</sub> Br <sub>2</sub> F <sub>18</sub> OS <sub>2</sub> | C <sub>38</sub> H <sub>16</sub> B <sub>2</sub> F <sub>18</sub> OS <sub>2</sub> | C <sub>34</sub> H <sub>12</sub> B <sub>2</sub> F <sub>18</sub> OS <sub>4</sub> |
| Formula weight<br>( <i>M<sub>w</sub></i> ) | 921.87                                                                                        | 916.25                                                                         | 928.30                                                                         |
| Crystal system                             | Monoclinic                                                                                    | Orthorhombic                                                                   | Monoclinic                                                                     |
| Space group                                | P 21/c                                                                                        | P b c a                                                                        | P 21/c                                                                         |
| a[Å]                                       | 11.7222(5)                                                                                    | 9.2316(3)                                                                      | 15.4128(8)                                                                     |
| b[Å]                                       | 15.8690(6)                                                                                    | 24.6720(8)                                                                     | 15.3848(8)                                                                     |
| c[Å]                                       | 17.8469(7)                                                                                    | 32.5936(10)                                                                    | 16.3220(8)                                                                     |
| $\alpha$ [°]                               | 90                                                                                            | 90                                                                             | 90                                                                             |
| $\beta$ [°]                                | 107.1070(10)                                                                                  | 90                                                                             | 111.557(2)                                                                     |
| $\gamma$ [°]                               | 90                                                                                            | 90                                                                             | 90                                                                             |
| V[Å <sup>3</sup> ]                         | 3173.0(2)                                                                                     | 7423.6(4)                                                                      | 3599.6(3)                                                                      |
| Z                                          | 4                                                                                             | 8                                                                              | 4                                                                              |
| $d_{\text{calcd}}$ [g cm <sup>-3</sup> ]   | 1.930                                                                                         | 1.640                                                                          | 1.713                                                                          |
| Reflections:                               | 67844/5896                                                                                    | 39510/7272                                                                     | 78388/7039                                                                     |

|                                    |                          |                          |                          |
|------------------------------------|--------------------------|--------------------------|--------------------------|
| total/independent                  |                          |                          |                          |
| R <sub>int</sub>                   | 0.0501                   | 0.0329                   | 0.0528                   |
| Final R1 and wR2                   | 0.0480, 0.1150           | 0.0526, 0.1409           | 0.0427, 0.1137           |
| Temperature [K]                    | 296                      | 173                      | 173                      |
| Crystal size [mm <sup>3</sup> ]    | 0.200 x 0.170 x<br>0.130 | 0.200 x 0.170 x<br>0.130 | 0.200 x 0.170 x<br>0.130 |
| θ range for data<br>collection [°] | 1.818 to 25.496          | 2.500 to 25.999          | 1.942 to 26.000          |

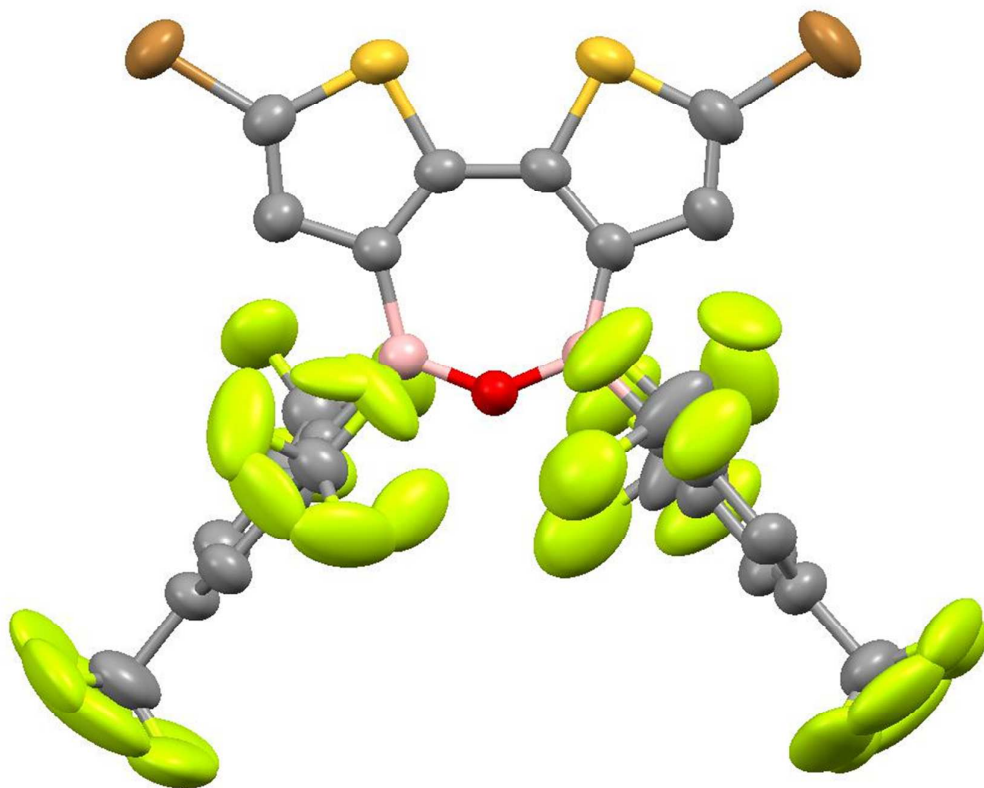

**Figure S1.** Single crystal structure of **4** (displacement ellipsoid set at 50% probability level, hydrogens omitted)

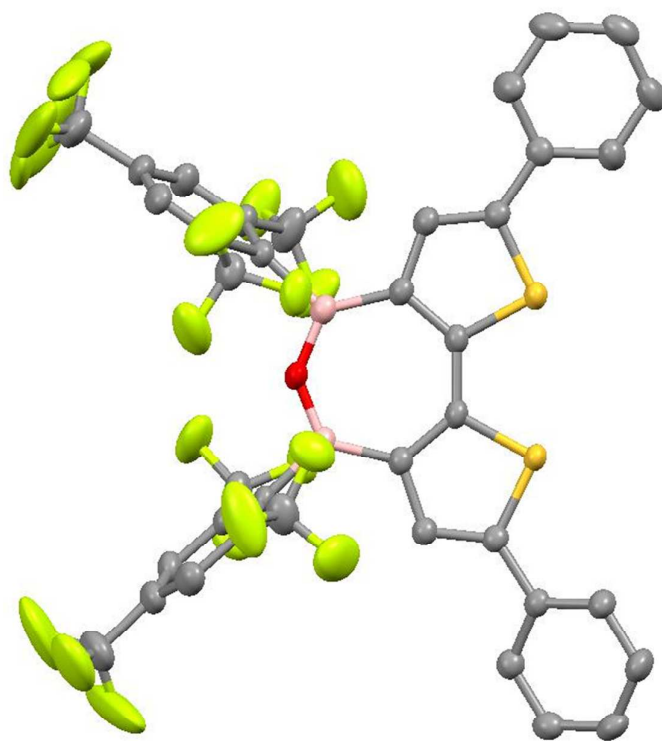

**Figure S2.** Single crystal structure of **5A** (displacement ellipsoid set at 50% probability level, hydrogens omitted)

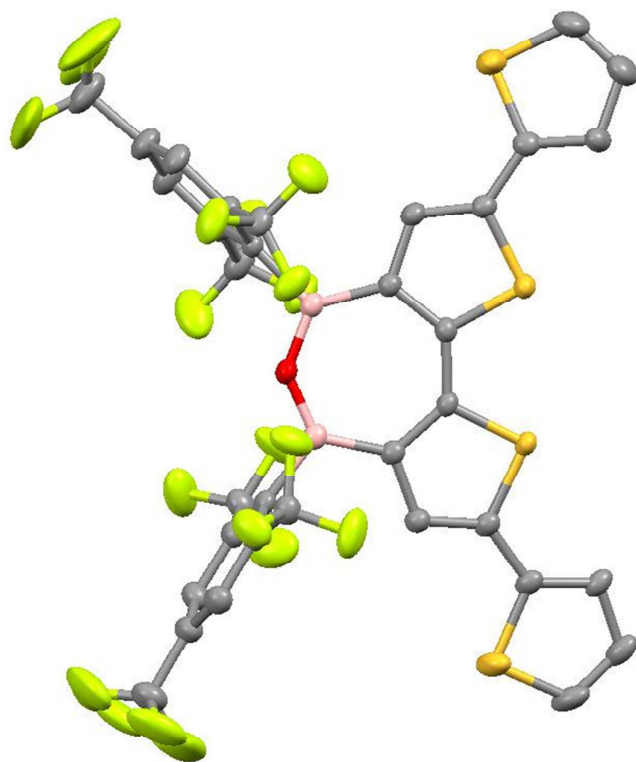

**Figure S3.** Single crystal structure of **5B** (displacement ellipsoid set at 50% probability level, hydrogens omitted)

### III. Photophysical and Electrochemical Measurements

Tetrahydrofuran (THF) and toluene were distilled over sodium and benzophenone prior to use. UV-Vis absorption spectra were recorded on a Varian Cary 500 spectrophotometer using the absorption mode in a 1-cm quartz cell. Fluorescence emission spectra were recorded in 1-cm quartz cuvette on a Horiba Jobin Yvon FluoroMax-4 spectrofluorometer. Fluorescence quantum yield was determined using absolute method by a calibrated integrating sphere system on a Horiba Jobin Yvon FluoroMax-4 spectrofluorometer.

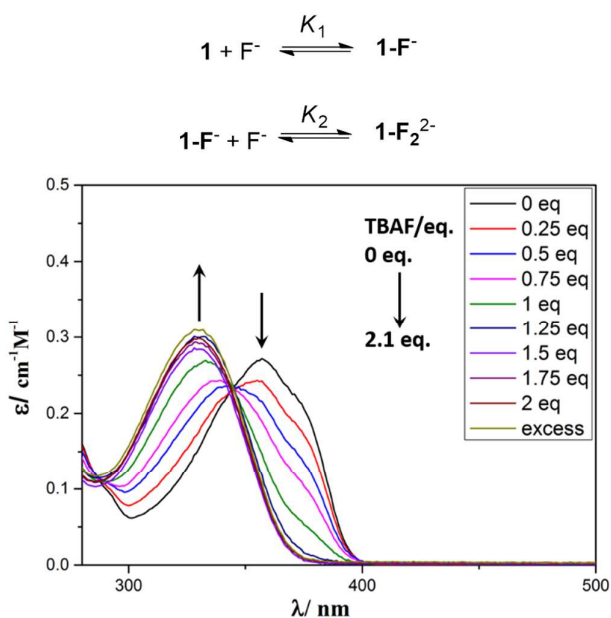

**Figure S4.** UV-vis absorption titration of TABF (tetrabutylammonium fluoride) to compound **1** (20  $\mu\text{M}$ ) in THF (arrows indicated change of direction upon adding TABF)

We examined fluoride ion ( $\text{F}^-$ ) binding properties of compound **1** by carrying out TABF (tetrabutylammonium fluoride) titration experiment (Figure S4). Upon adding TABF, the original absorption peak at 359 nm of **1** decreased accompanied by the rise of a new absorption band around 330 nm, evidencing coordination of  $\text{F}^-$  to the boron centers. The spectral change occurred with a *quasi*-isobestic point at 344 nm and became saturated after ca. 1.5 eq. of  $\text{F}^-$ . As there are two boron centers in **1**, two  $\text{F}^-$



binding ability had been expected. However, Job plot results were inconclusive to determine a dominant binding species ( $\mathbf{1}\text{-F}^-$  or  $\mathbf{1}\text{-F}_2^{2-}$ ). Such results implied that two boron centers in **1** can coordinate to  $\text{F}^-$ , sequentially, but with attenuated association constant ( $K_2 < K_1$ ). We think after the first  $\text{F}^-$  coordination, the oxadiborepine moiety became twisted and negative charged, so affinity to the second  $\text{F}^-$  was weakened.

Differential pulse voltammetry (DPV) and cyclic voltammetry (CV) was performed on a CHI610E electrochemical workstation with three electrodes configuration, using Ag/AgCl as the reference electrode, a Pt plate as the counter electrode, and a glassy carbon as the working electrode. Samples were dissolved in THF with 0.1 M  $\text{Bu}_4\text{NPF}_6$  as the supporting electrolyte. Half-wave potentials were determined by DPV.

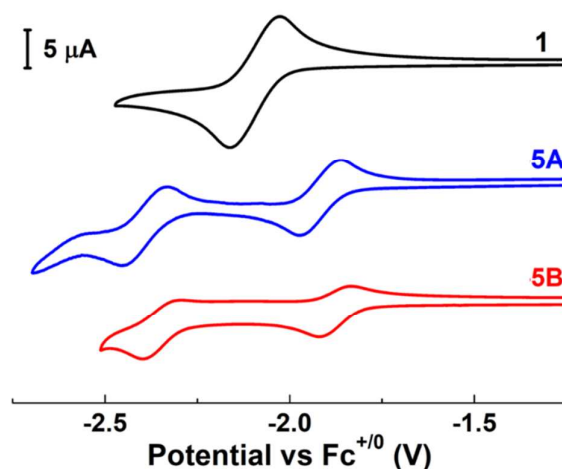

**Figure S5.** Cyclic voltammograms of **1**, **5A**, and **5B** in THF

#### IV. DFT Calculations

DFT calculations were carried out on compounds **1**, **5A**, and **5B** at theory level of B3LYP/6-31G(d,p) for geometry and frontier molecular orbital (FMO) energy level, and B3LYP/6-311G+(d,p) for nuclear independent chemical shift (NICS) and TD-DFT calculations. Quantum-chemical calculation was performed with the Gaussian09<sup>S1</sup> package and the orbital pictures were prepared using Gaussview.<sup>S2</sup>

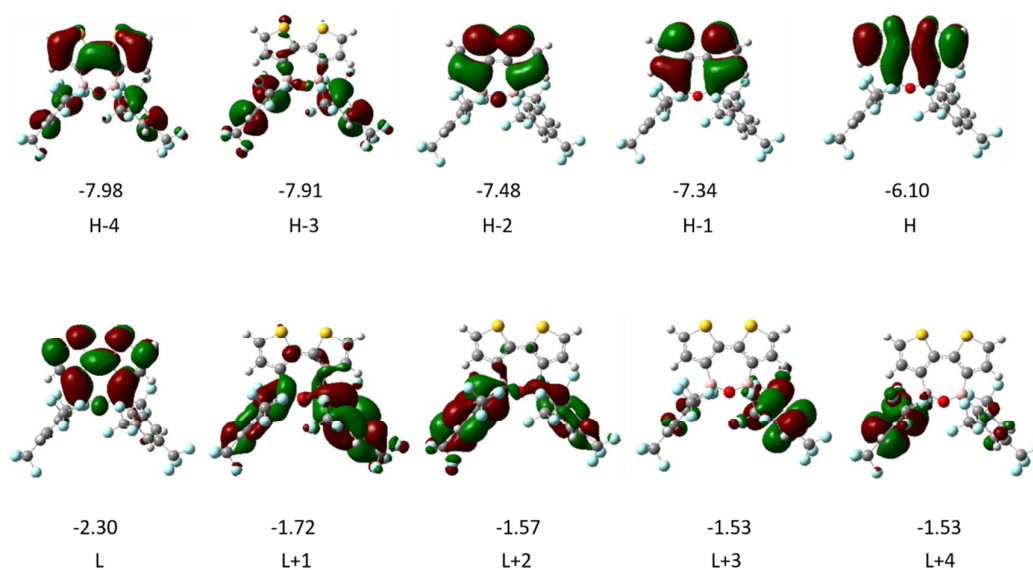

**Figure S6.** DFT calculated FMO distributions of **1** (Isovalue set as 0.02; H: HOMO; L: LUMO; energy levels in eV)

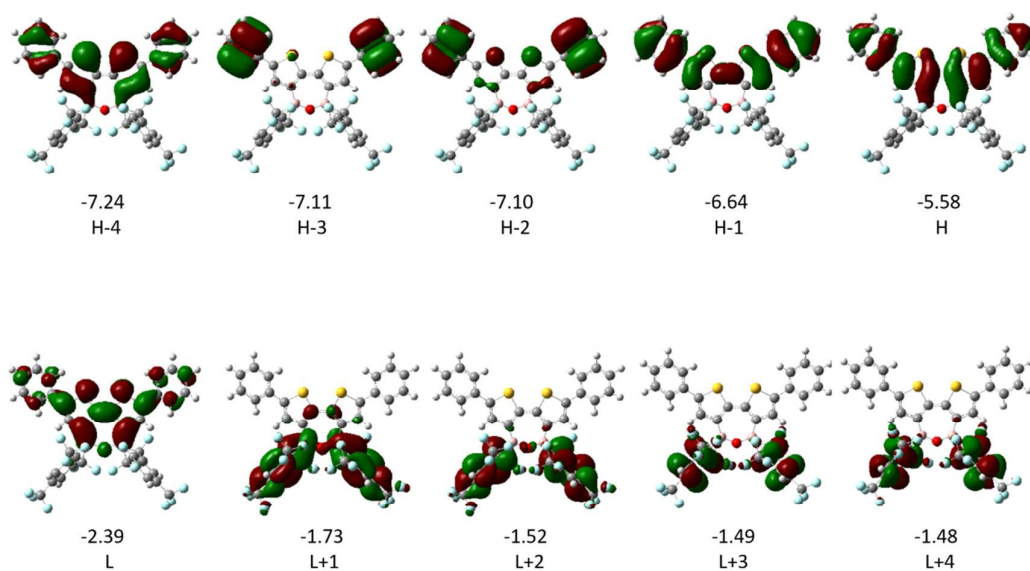

**Figure S7.** DFT calculated FMO distributions of **5A** (Isovalue set as 0.02; H: HOMO; L: LUMO; energy levels in eV)

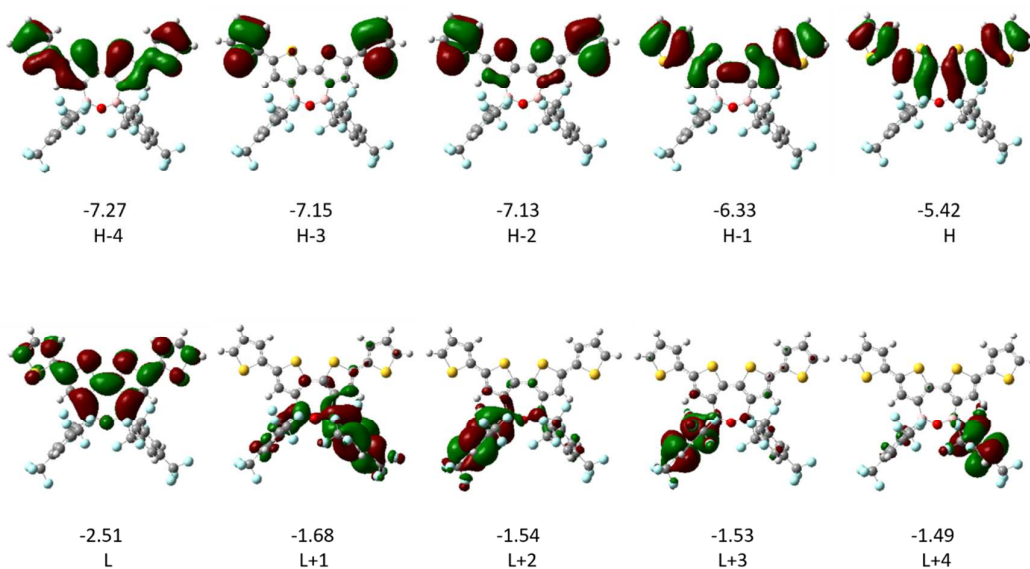

**Figure S8.** DFT calculated FMO distributions of **5B** (Isovalue set as 0.02; H: HOMO; L: LUMO; energy levels in eV)

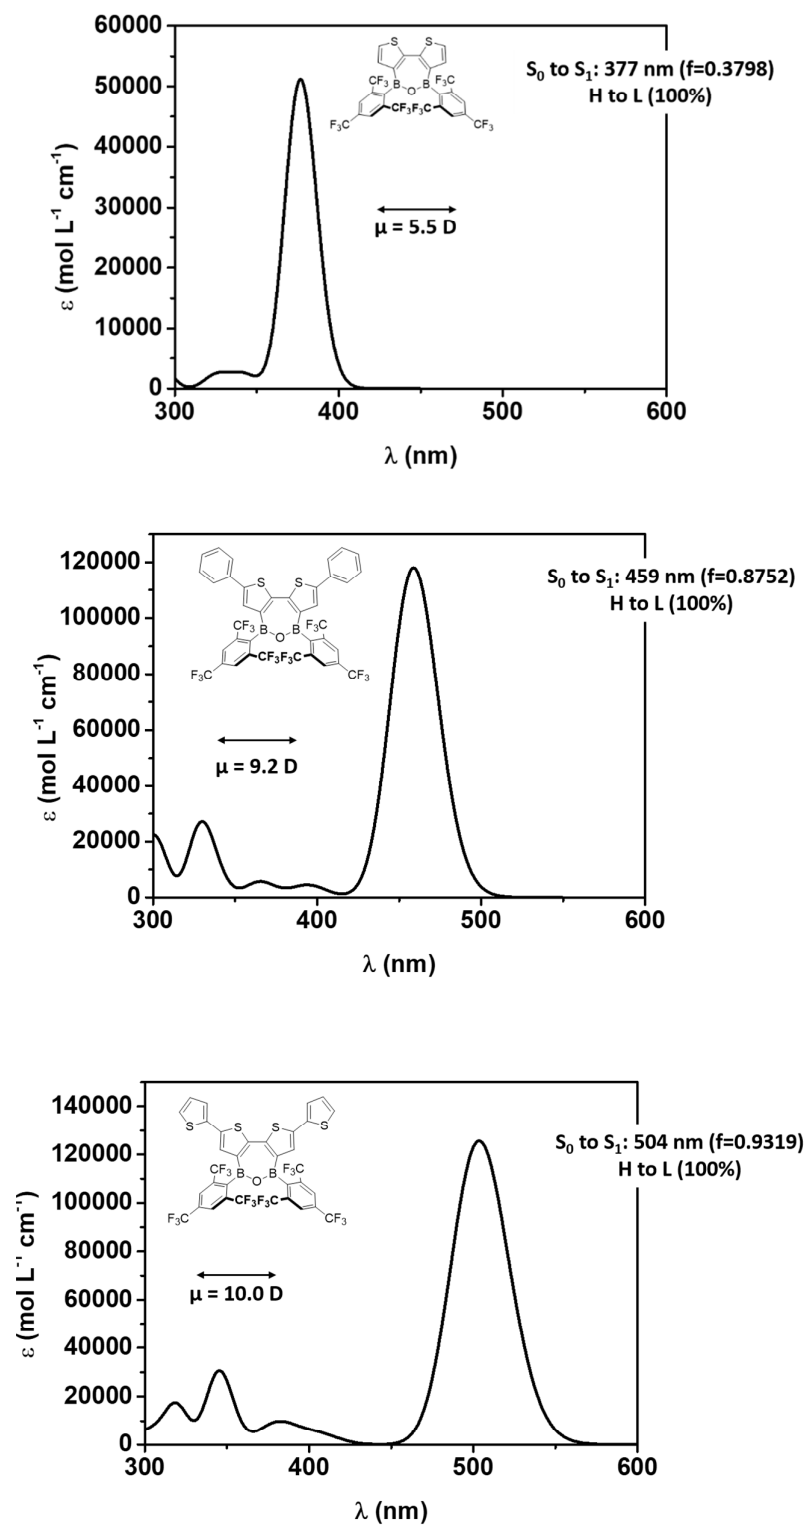

**Figure S9.** TD-DFT calculated UV-visible absorption spectra of **1**, **5A**, and **5B**

Table S2. Cartesian coordinates of optimized structure of **1** (Sum of electronic and zero-point Energies of **1** is -3713.902233 Hartree)

|   |          |          |          |
|---|----------|----------|----------|
| C | 0.767248 | 3.483475 | 0.363283 |
| C | -0.66416 | 3.516193 | 0.160424 |
| C | -1.57068 | 2.459204 | -0.00291 |
| B | -1.24309 | 0.955712 | -0.01383 |
| O | 0.016924 | 0.428343 | 0.027155 |
| B | 1.28728  | 0.91288  | 0.136136 |
| C | 1.650975 | 2.39547  | 0.35006  |
| S | -1.49622 | 5.060897 | 0.115028 |
| C | -3.034   | 4.29803  | -0.11277 |
| C | -2.91544 | 2.942639 | -0.15384 |
| C | 3.00212  | 2.819371 | 0.592654 |
| C | 3.146954 | 4.159257 | 0.784376 |
| S | 1.627609 | 4.981713 | 0.676145 |
| C | -2.40733 | -0.14609 | -0.10578 |
| C | 2.415928 | -0.22613 | 0.064031 |
| C | -2.8776  | -0.62996 | -1.34402 |
| C | -3.82086 | -1.65335 | -1.4299  |
| C | -4.32834 | -2.2281  | -0.26752 |
| C | -3.90541 | -1.76159 | 0.972946 |
| C | -2.9618  | -0.73553 | 1.045986 |
| C | 2.637191 | -1.10658 | 1.142357 |
| C | 3.592191 | -2.12094 | 1.085163 |
| C | 4.35209  | -2.29406 | -0.06898 |
| C | 4.147594 | -1.45752 | -1.1621  |
| C | 3.19432  | -0.44096 | -1.08937 |
| C | -2.43605 | 0.021704 | -2.63435 |
| C | -2.63372 | -0.2114  | 2.424995 |
| C | -5.2923  | -3.38324 | -0.3517  |
| C | 3.035263 | 0.456452 | -2.29517 |
| C | 1.788707 | -1.01336 | 2.391225 |
| C | 5.424418 | -3.35189 | -0.11309 |
| F | -3.54004 | 0.714806 | 2.81445  |
| F | -1.42021 | 0.383595 | 2.478532 |
| F | -2.64518 | -1.19024 | 3.351422 |
| F | 2.415071 | -1.53995 | 3.464365 |
| F | 1.484723 | 0.271171 | 2.696182 |
| F | -2.58556 | -0.7967  | -3.69502 |
| F | -1.13786 | 0.401564 | -2.59781 |
| F | -6.14799 | -3.39254 | 0.692482 |
| F | -6.02471 | -3.33812 | -1.48476 |

|   |          |          |          |
|---|----------|----------|----------|
| F | -3.16197 | 1.136846 | -2.88621 |
| F | -4.64347 | -4.5685  | -0.34405 |
| F | 3.40052  | -0.1635  | -3.43535 |
| F | 1.752048 | 0.863146 | -2.45099 |
| F | 6.60209  | -2.87768 | 0.351868 |
| F | 5.100314 | -4.41979 | 0.64597  |
| F | 3.792416 | 1.572194 | -2.19124 |
| F | 5.641154 | -3.78934 | -1.37115 |
| F | 0.619821 | -1.67377 | 2.249315 |
| H | -3.92582 | 4.901806 | -0.20636 |
| H | -3.76349 | 2.284702 | -0.29794 |
| H | 3.838438 | 2.131901 | 0.620353 |
| H | 4.049838 | 4.719559 | 0.983248 |
| H | -4.15767 | -1.99997 | -2.3991  |
| H | -4.30674 | -2.19345 | 1.882169 |
| H | 3.737092 | -2.77716 | 1.934639 |
| H | 4.715361 | -1.60435 | -2.07277 |

Table S3. Cartesian coordinates of optimized structure of **5A** (Sum of electronic and zero-point Energies of **5A** is -4175.873407 Hartree)

|   |          |          |          |
|---|----------|----------|----------|
| C | 0.718272 | 2.513281 | 0.033025 |
| C | -0.72166 | 2.515201 | -0.03097 |
| C | -1.6276  | 1.44251  | -0.0344  |
| B | -1.27511 | -0.05602 | -0.00189 |
| O | -0.00556 | -0.55734 | -0.00832 |
| B | 1.265424 | -0.05908 | -0.00781 |
| C | 1.621648 | 1.438358 | 0.032146 |
| S | -1.57435 | 4.046145 | -0.12558 |
| C | -3.14164 | 3.264929 | -0.14935 |
| C | -2.97984 | 1.903713 | -0.10141 |
| C | 2.974992 | 1.896002 | 0.101882 |
| C | 3.140052 | 3.25662  | 0.155721 |
| S | 1.574589 | 4.041664 | 0.134789 |
| C | -2.40425 | -1.195   | -0.01592 |
| C | 2.391538 | -1.20095 | 0.006454 |
| C | -2.68085 | -1.92836 | -1.18778 |
| C | -3.64054 | -2.93929 | -1.21719 |
| C | -4.34706 | -3.2592  | -0.06015 |
| C | -4.08398 | -2.57332 | 1.12155  |
| C | -3.12598 | -1.55856 | 1.136318 |
| C | 2.655166 | -1.94429 | 1.17476  |
| C | 3.607742 | -2.96228 | 1.203977 |
| C | 4.320346 | -3.27837 | 0.049937 |
| C | 4.068599 | -2.58361 | -1.12935 |
| C | 3.117965 | -1.5623  | -1.14382 |
| C | -1.89108 | -1.67217 | -2.45267 |
| C | -2.90306 | -0.82554 | 2.439235 |
| C | -5.3466  | -4.38676 | -0.07644 |
| C | 2.900424 | -0.82625 | -2.44603 |
| C | 1.851681 | -1.69994 | 2.433296 |
| C | 5.39244  | -4.33639 | 0.089328 |
| F | -3.66348 | 0.290255 | 2.521496 |
| F | -1.6135  | -0.43626 | 2.580765 |
| F | -3.21088 | -1.59136 | 3.505214 |
| F | 2.516468 | -2.09896 | 3.538042 |
| F | 1.557493 | -0.38712 | 2.595625 |
| F | -2.5627  | -2.07086 | -3.55326 |
| F | -0.71205 | -2.32895 | -2.44558 |
| F | -6.30201 | -4.21854 | 0.862137 |
| F | -5.95997 | -4.48699 | -1.27512 |

|   |          |          |          |
|---|----------|----------|----------|
| F | -1.608   | -0.35644 | -2.61124 |
| F | -4.75425 | -5.57675 | 0.166806 |
| F | 3.210584 | -1.59014 | -3.51265 |
| F | 1.612095 | -0.43429 | -2.59122 |
| F | 6.593932 | -3.80726 | 0.413769 |
| F | 5.118845 | -5.28911 | 1.005221 |
| F | 3.66304  | 0.288437 | -2.52299 |
| F | 5.536679 | -4.94354 | -1.10728 |
| F | 0.677877 | -2.36577 | 2.412763 |
| C | 4.383584 | 4.030729 | 0.231339 |
| C | 5.539875 | 3.455694 | 0.791085 |
| C | 6.731379 | 4.172423 | 0.853613 |
| C | 6.793439 | 5.481933 | 0.372003 |
| C | 5.651563 | 6.067414 | -0.17679 |
| C | 4.460138 | 5.349889 | -0.25031 |
| C | -4.38345 | 4.042154 | -0.22128 |
| C | -4.4574  | 5.358853 | 0.267446 |
| C | -5.6473  | 6.079255 | 0.197455 |
| C | -6.79024 | 5.499149 | -0.35484 |
| C | -6.73074 | 4.192158 | -0.84356 |
| C | -5.54075 | 3.472614 | -0.78454 |
| H | -3.82558 | 1.22803  | -0.07897 |
| H | 3.819065 | 1.218342 | 0.076913 |
| H | -3.84198 | -3.46862 | -2.1405  |
| H | -4.61978 | -2.82652 | 2.028173 |
| H | 3.787051 | -3.51065 | 2.120647 |
| H | 4.596468 | -2.8462  | -2.03798 |
| H | 5.494505 | 2.450502 | 1.197677 |
| H | 7.611613 | 3.710849 | 1.291224 |
| H | 7.722425 | 6.041156 | 0.426809 |
| H | 5.689181 | 7.083629 | -0.55768 |
| H | 3.586461 | 5.808234 | -0.70451 |
| H | -3.58288 | 5.812873 | 0.724369 |
| H | -5.68292 | 7.093471 | 0.583818 |
| H | -7.71803 | 6.060602 | -0.40692 |
| H | -7.61179 | 3.734866 | -1.28403 |
| H | -5.49722 | 2.469598 | -1.19668 |



Table S4. Cartesian coordinates of optimized structure of **5B** (Sum of electronic and zero-point Energies of **5B** is -4817.444896 Hartree)

|   |          |          |          |
|---|----------|----------|----------|
| C | 0.751022 | 2.510971 | 0.133318 |
| C | -0.68376 | 2.528341 | 0.031125 |
| C | -1.5968  | 1.462411 | -0.0118  |
| B | -1.25847 | -0.04094 | 0.030665 |
| O | 0.006509 | -0.55695 | -0.00829 |
| B | 1.277835 | -0.06302 | -0.03566 |
| C | 1.644763 | 1.428776 | 0.093543 |
| S | -1.52363 | 4.070628 | -0.03544 |
| C | -3.09573 | 3.297298 | -0.08699 |
| C | -2.94452 | 1.93177  | -0.07255 |
| C | 2.99957  | 1.866854 | 0.206066 |
| C | 3.174536 | 3.223416 | 0.33522  |
| S | 1.616971 | 4.027217 | 0.332207 |
| C | 4.398653 | 3.982555 | 0.471407 |
| C | -4.30745 | 4.085558 | -0.14918 |
| C | -2.41712 | -1.15085 | 0.084056 |
| C | 2.406542 | -1.19506 | -0.17374 |
| C | -3.04117 | -1.62976 | -1.08862 |
| C | -4.00169 | -2.63852 | -1.0582  |
| C | -4.37364 | -3.20757 | 0.158535 |
| C | -3.78691 | -2.75711 | 1.334601 |
| C | -2.82392 | -1.74534 | 1.291158 |
| C | 2.732351 | -2.0382  | 0.907157 |
| C | 3.688677 | -3.0475  | 0.796964 |
| C | 4.342542 | -3.25328 | -0.41454 |
| C | 4.032718 | -2.45369 | -1.51121 |
| C | 3.081233 | -1.44122 | -1.38555 |
| C | -2.73695 | -1.0016  | -2.4296  |
| C | -2.27509 | -1.30903 | 2.629854 |
| C | -5.36723 | -4.34013 | 0.186847 |
| C | 2.806386 | -0.5848  | -2.60055 |
| C | 1.99652  | -1.91309 | 2.222677 |
| C | 5.414396 | -4.30622 | -0.53028 |
| F | -3.25033 | -0.77928 | 3.40206  |
| F | -1.30539 | -0.37258 | 2.517446 |
| F | -1.75691 | -2.34882 | 3.314354 |
| F | 2.724137 | -2.39291 | 3.252723 |
| F | 1.697435 | -0.62341 | 2.510206 |
| F | -2.98531 | -1.84586 | -3.45109 |
| F | -1.44262 | -0.61782 | -2.52978 |

|   |          |          |          |
|---|----------|----------|----------|
| F | -6.01726 | -4.40273 | 1.367746 |
| F | -6.29329 | -4.21008 | -0.78711 |
| F | -3.49069 | 0.103352 | -2.63644 |
| F | -4.76112 | -5.53345 | 0.000842 |
| F | 3.083882 | -1.23665 | -3.74784 |
| F | 1.507838 | -0.20143 | -2.65997 |
| F | 5.233282 | -5.30245 | 0.361615 |
| F | 5.438295 | -4.85528 | -1.76321 |
| F | 3.550739 | 0.543579 | -2.59594 |
| F | 6.641915 | -3.7867  | -0.30404 |
| F | 0.831478 | -2.5951  | 2.206671 |
| C | -4.48783 | 5.422546 | 0.138492 |
| C | -5.82971 | 5.862772 | -0.02971 |
| C | -6.66806 | 4.863949 | -0.44381 |
| S | -5.82732 | 3.362187 | -0.6493  |
| S | 5.908902 | 3.190296 | 0.88985  |
| C | 6.771593 | 4.692878 | 0.835013 |
| C | 5.947423 | 5.740194 | 0.525823 |
| C | 4.598787 | 5.338764 | 0.318699 |
| H | -3.79506 | 1.261252 | -0.09703 |
| H | 3.838288 | 1.181782 | 0.172182 |
| H | -4.45854 | -2.97916 | -1.97942 |
| H | -4.07853 | -3.18755 | 2.285929 |
| H | 3.916387 | -3.67416 | 1.650371 |
| H | 4.517162 | -2.62696 | -2.46452 |
| H | -3.68317 | 6.064217 | 0.479622 |
| H | -6.15828 | 6.878485 | 0.156426 |
| H | -7.72895 | 4.916747 | -0.64424 |
| H | 7.833507 | 4.709407 | 1.036175 |
| H | 6.29065  | 6.764584 | 0.441636 |
| H | 3.803212 | 6.023566 | 0.047309 |

## NMR Charts

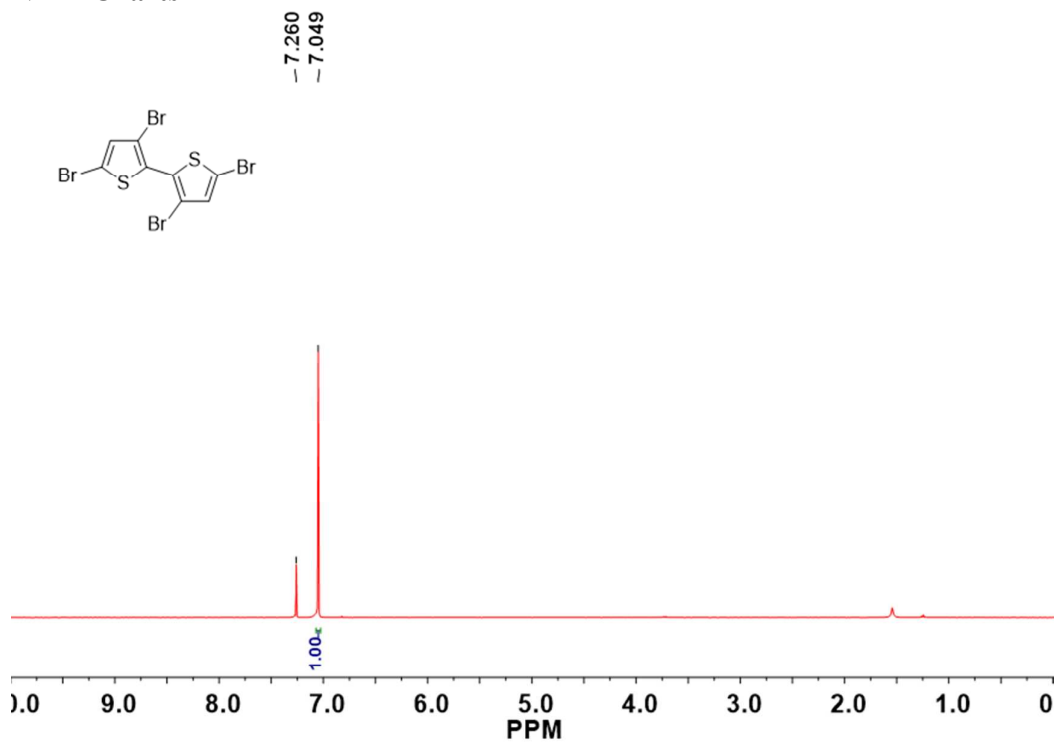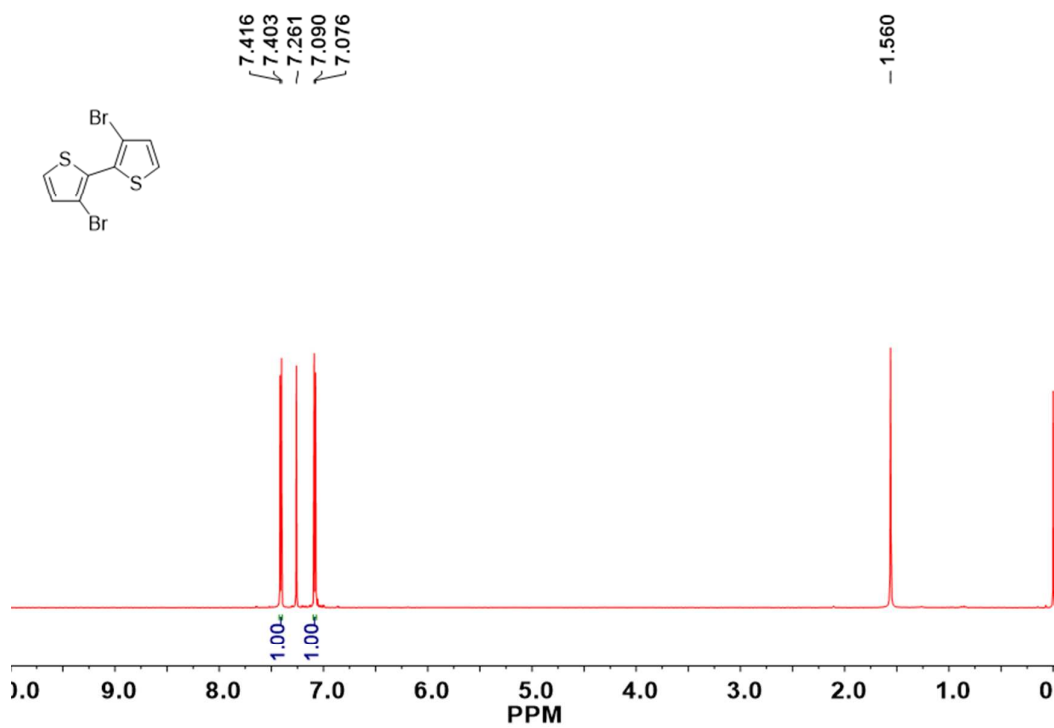

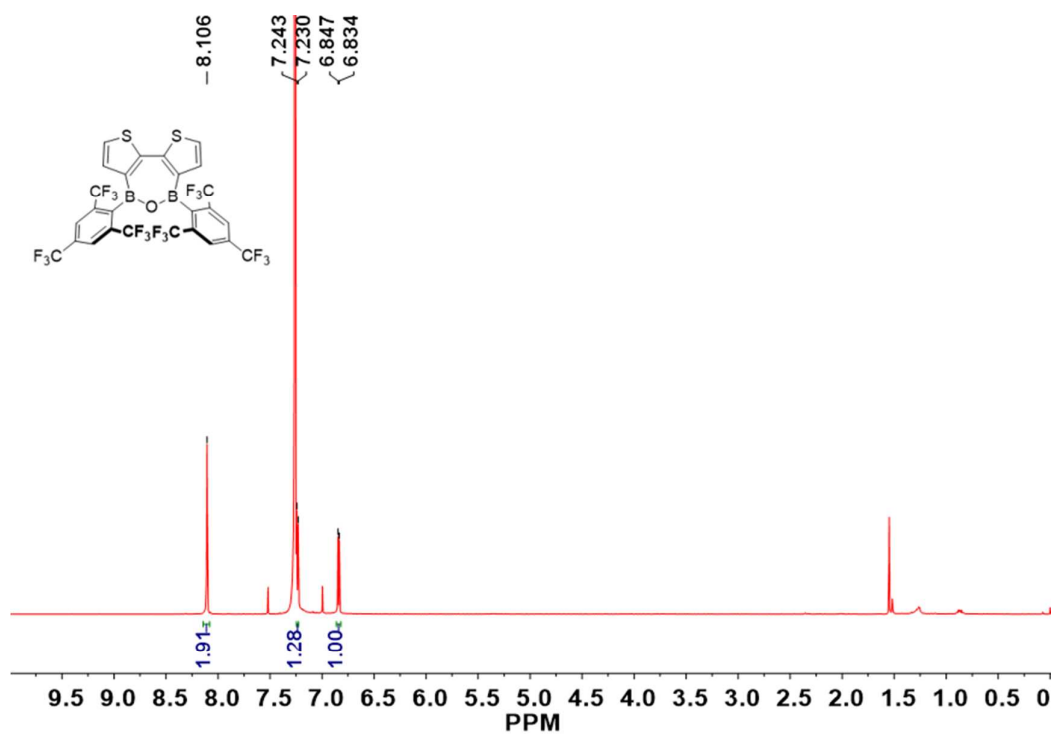

<sup>1</sup>H NMR spectrum of **1**

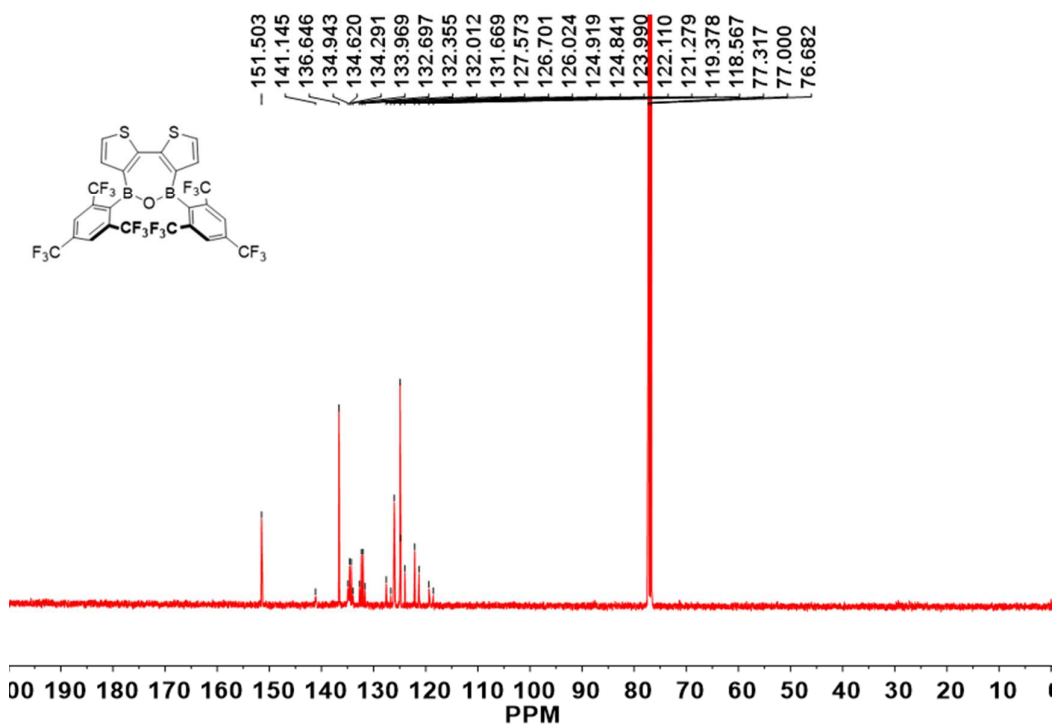

<sup>13</sup>C NMR spectrum of **1**

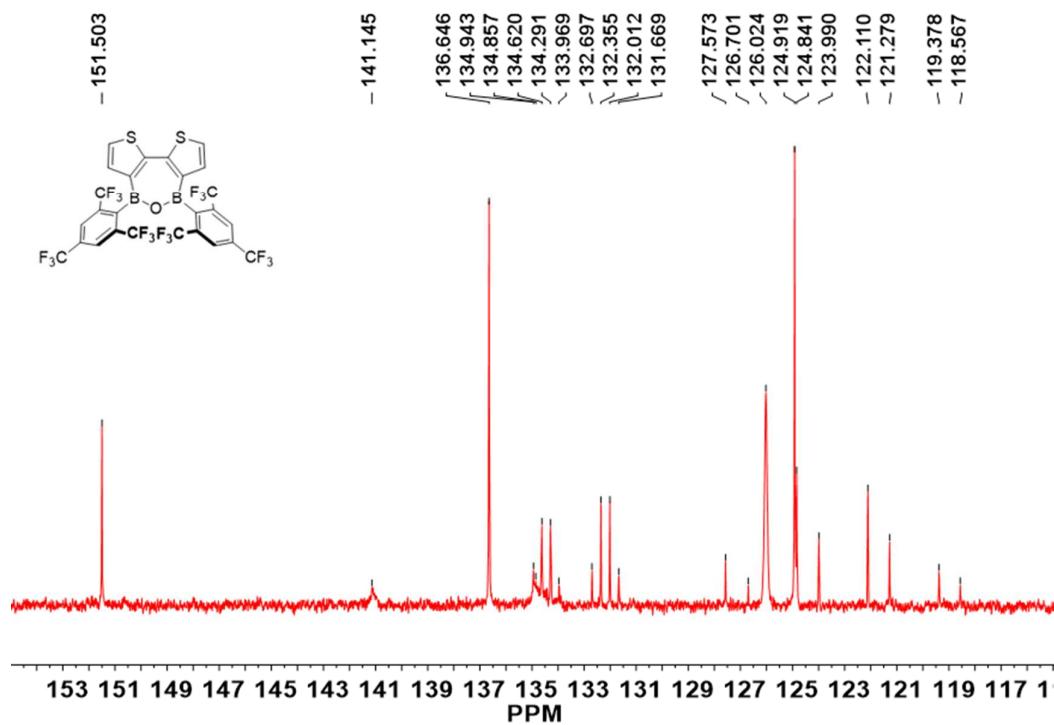

<sup>13</sup>C NMR spectrum of **1** (aromatic region)

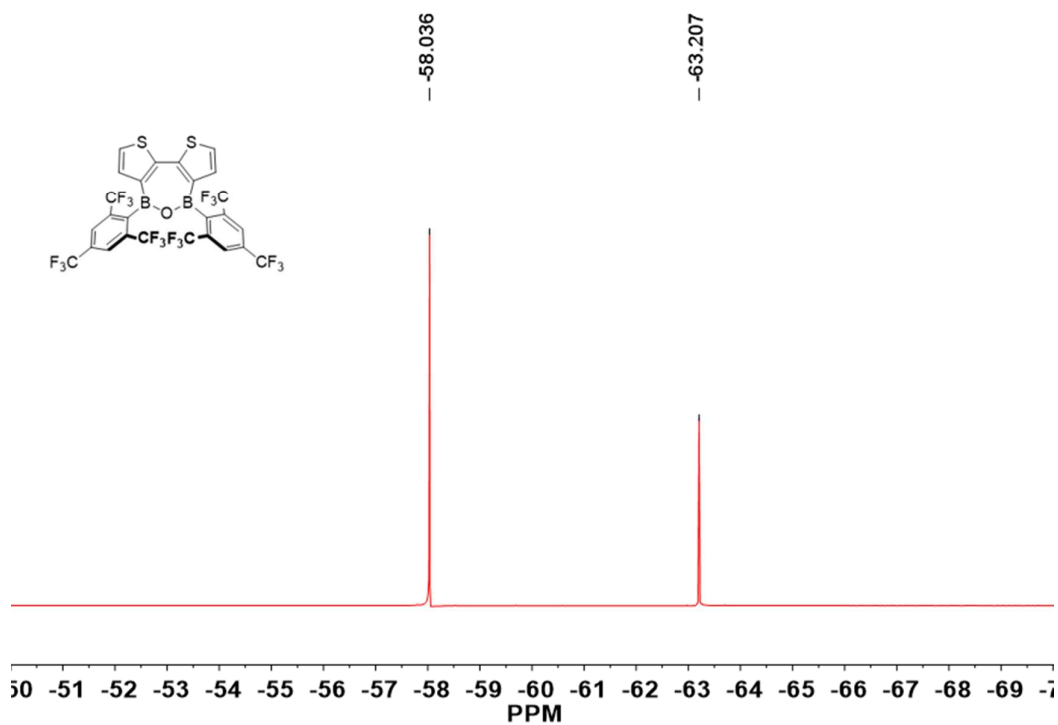

<sup>19</sup>F NMR spectrum of **1**

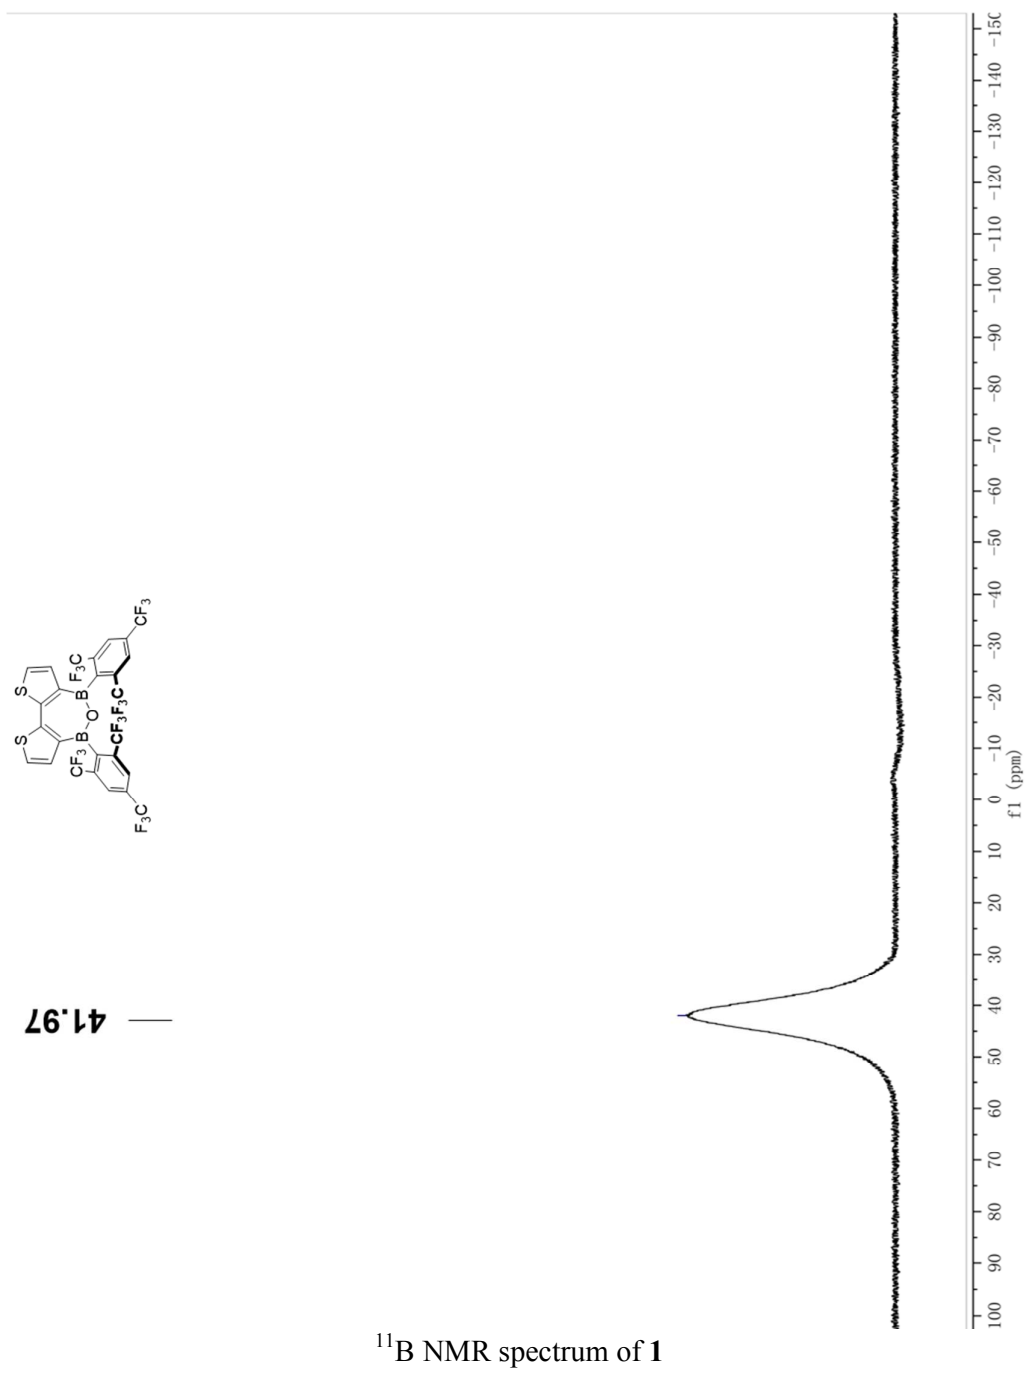

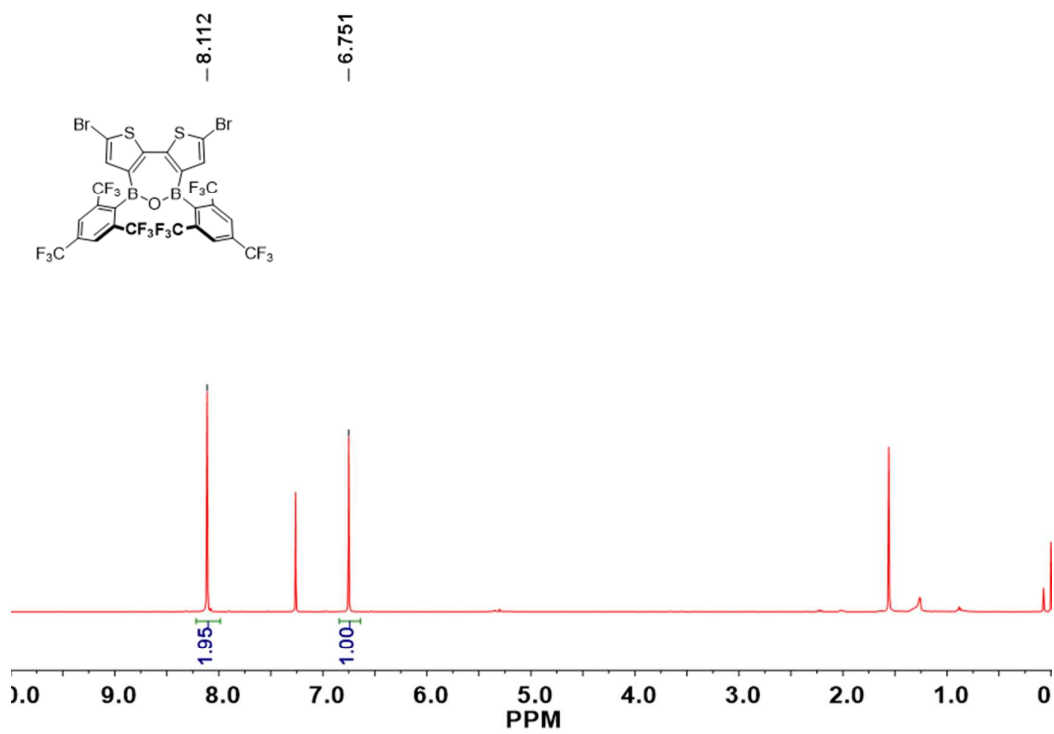

$^1\text{H}$  NMR spectrum of **4**

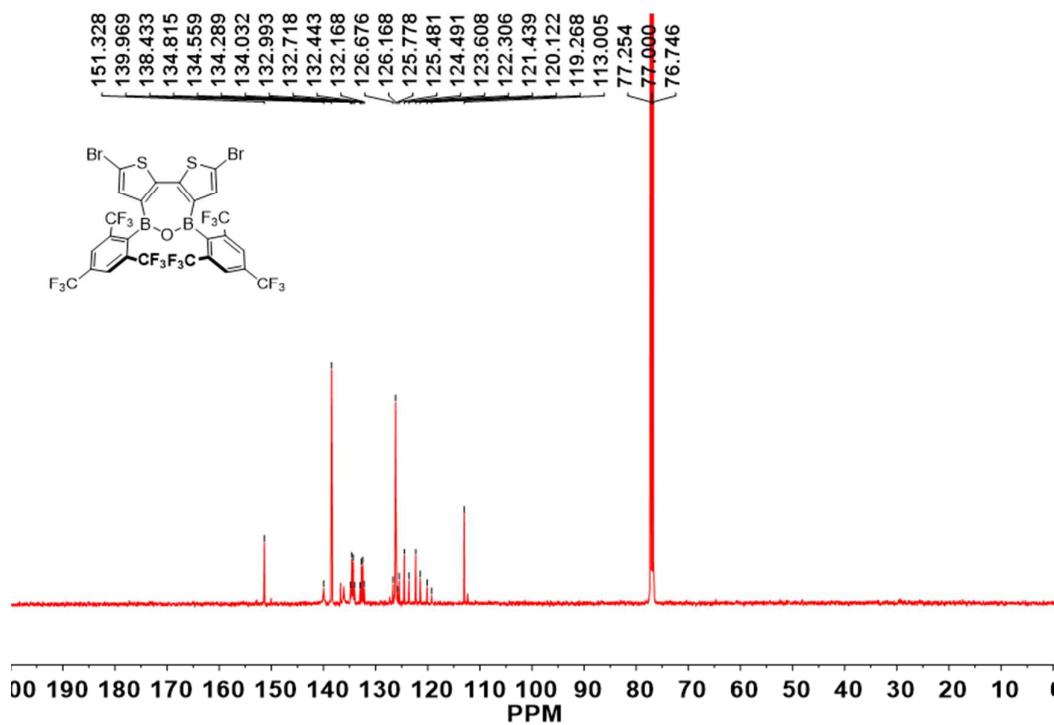

$^{13}\text{C}$  NMR spectrum of **4**

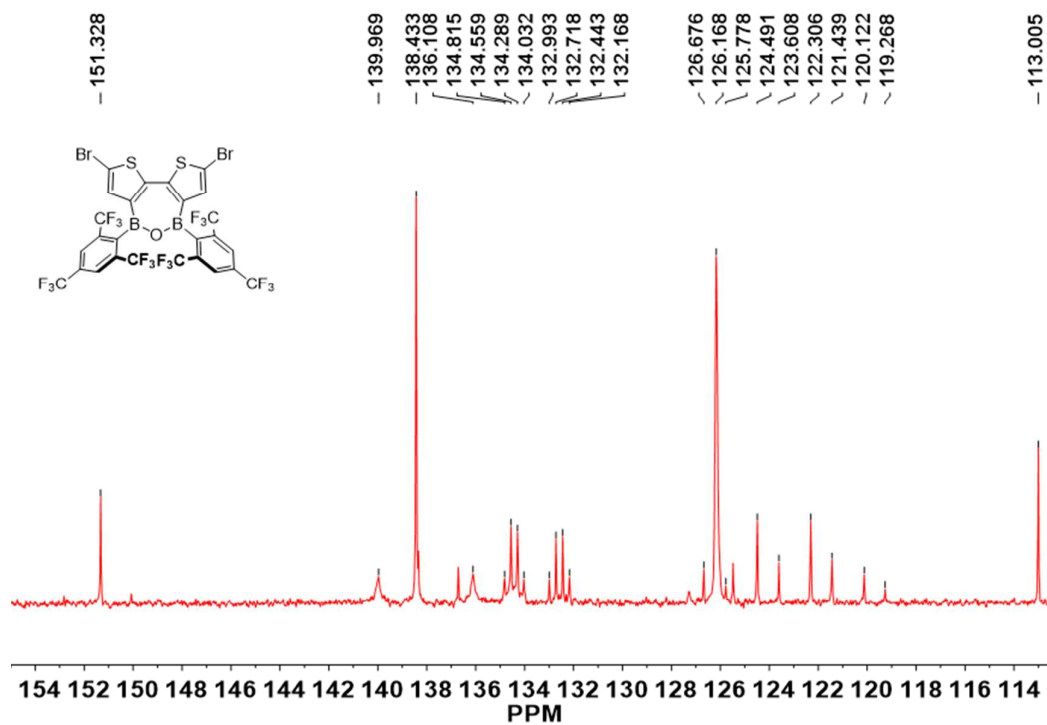

<sup>13</sup>C NMR spectrum of **4** (aromatic region)

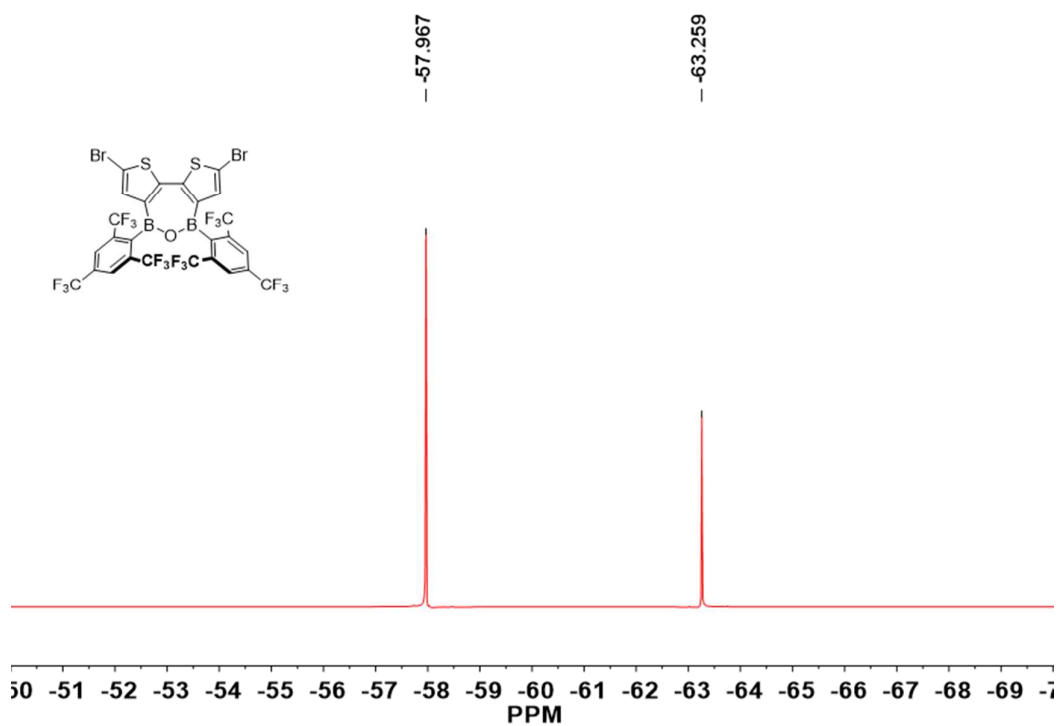

<sup>19</sup>F NMR spectrum of **4**



$^{11}\text{B}$  NMR spectrum of **4**

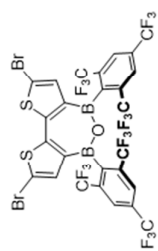

41.35

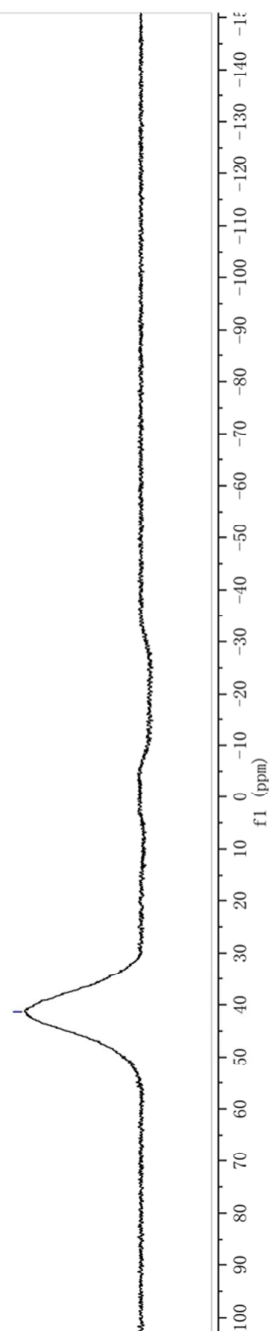

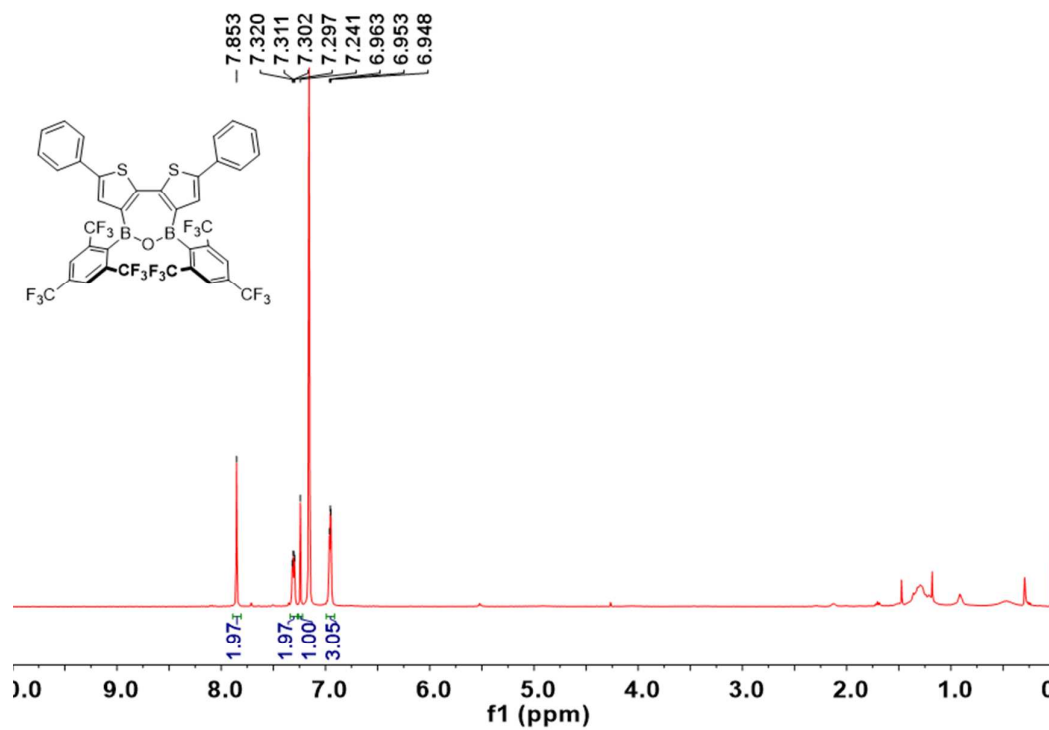

<sup>1</sup>H NMR spectrum of **5A**

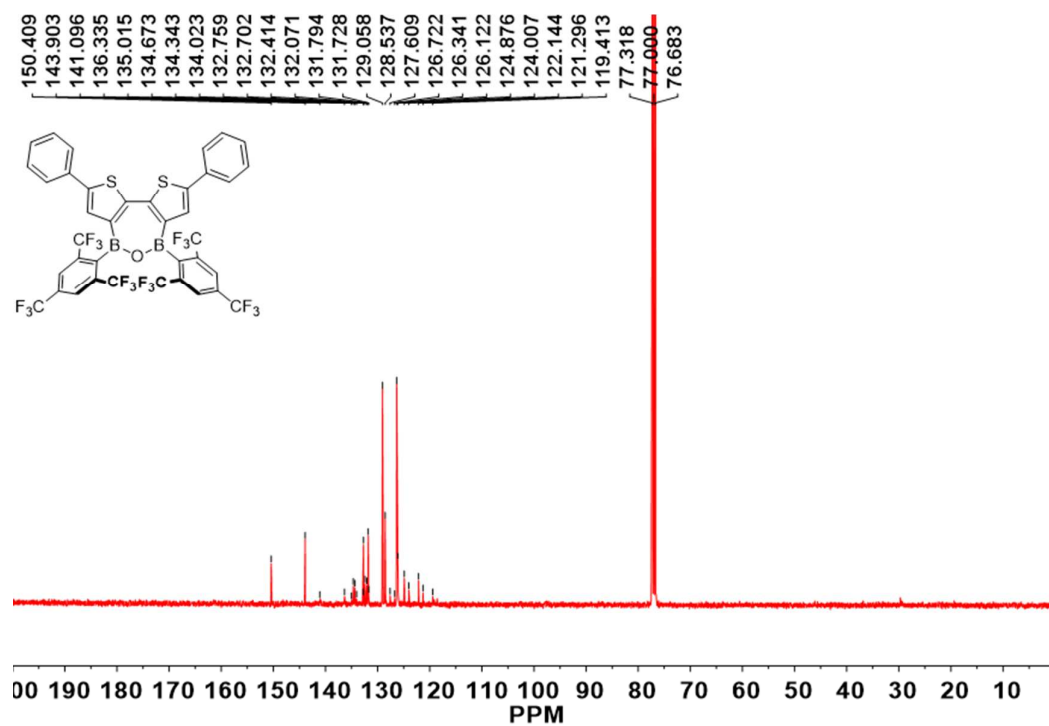

<sup>13</sup>C NMR spectrum of **5A**

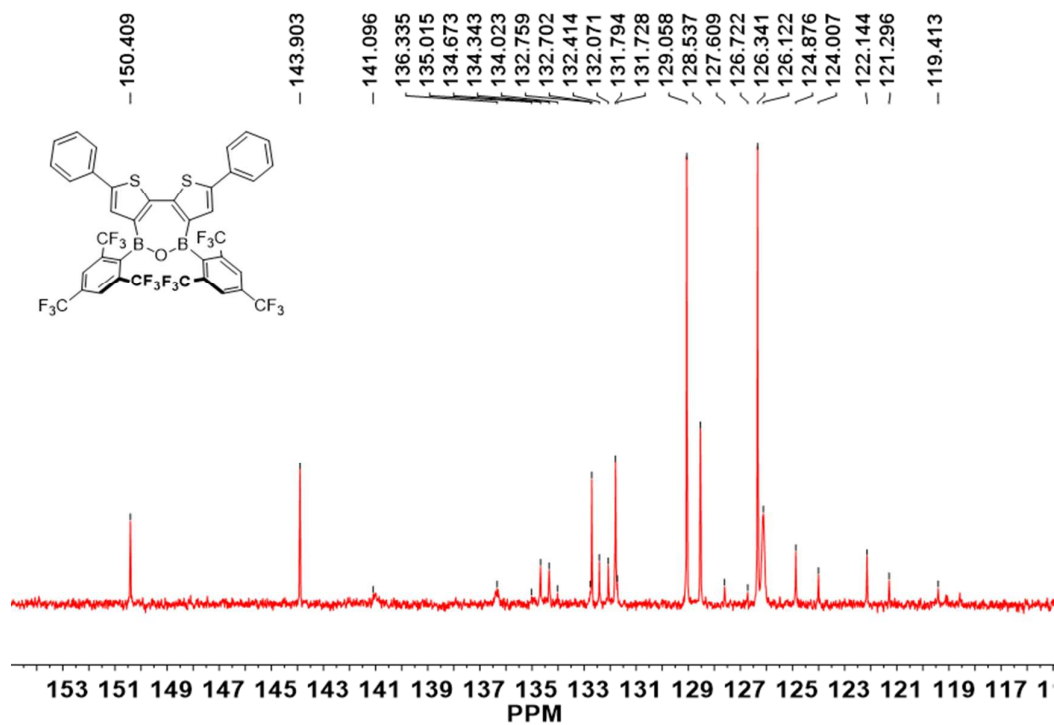

<sup>13</sup>C NMR spectrum of **5A** (aromatic region)

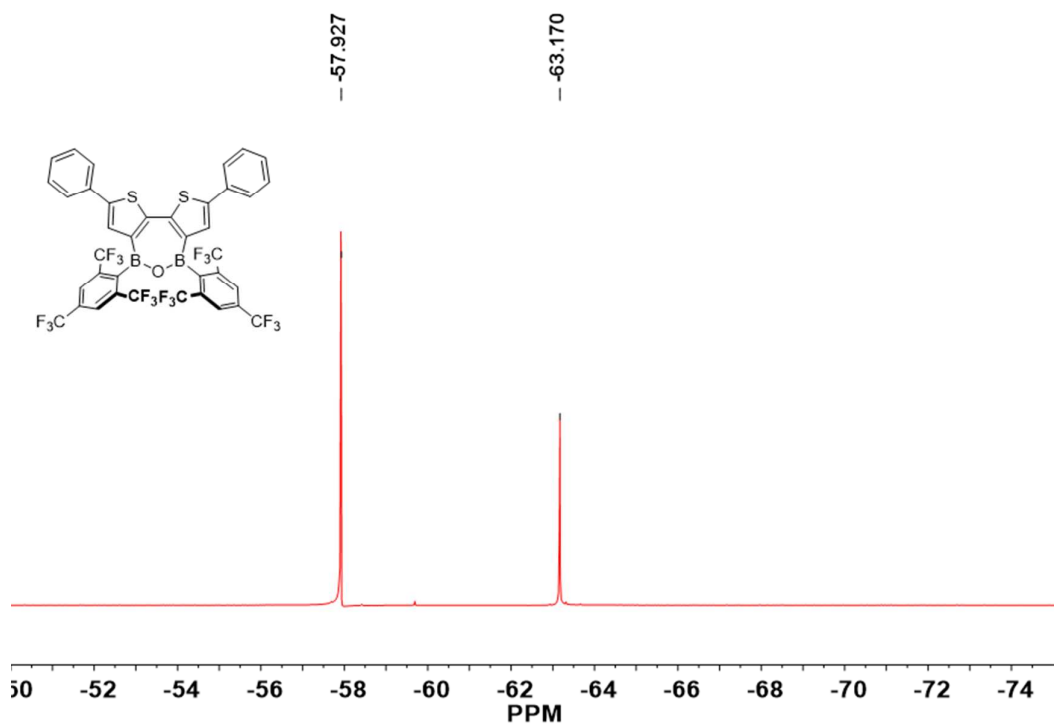

<sup>19</sup>F NMR spectrum of **5A**

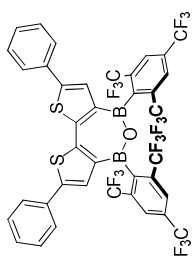

42.49

$^{11}\text{B}$  NMR spectrum of **5A**

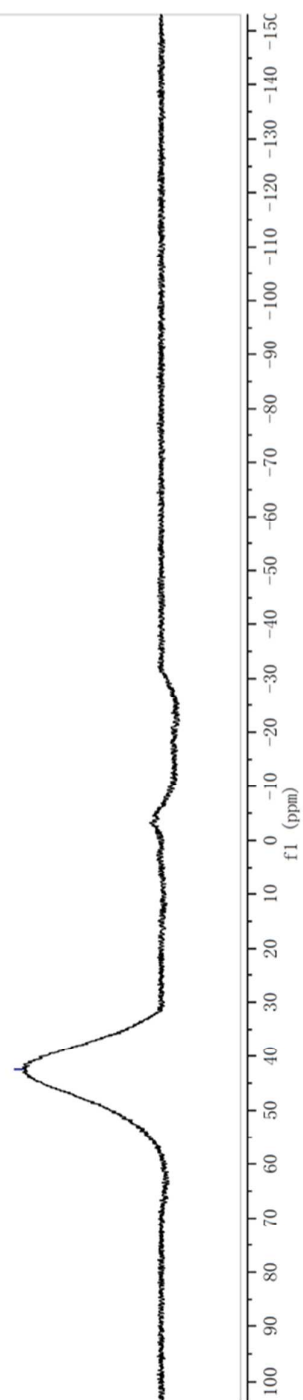

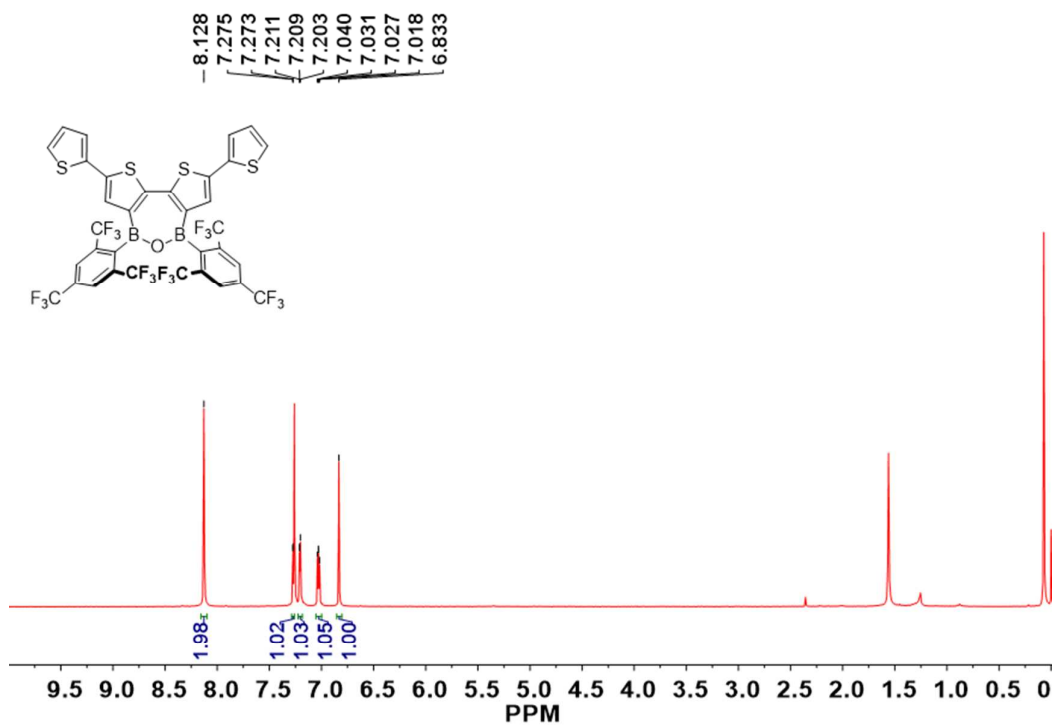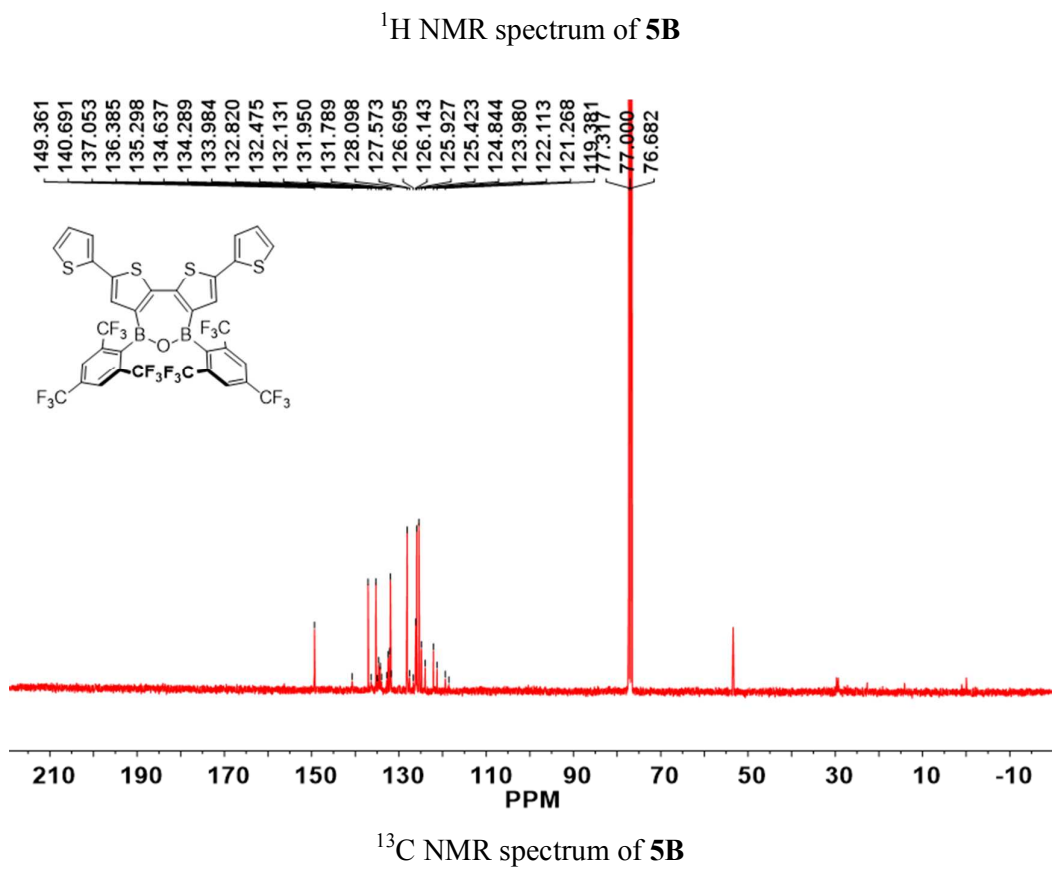

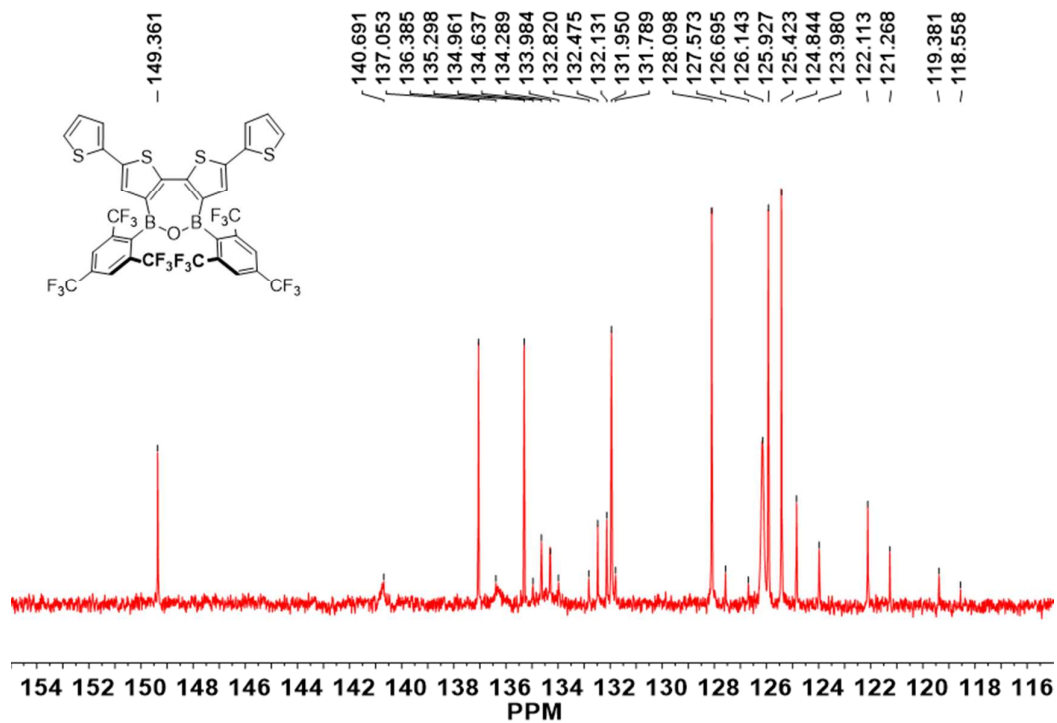

<sup>13</sup>C NMR spectrum of **5B** (aromatic region)

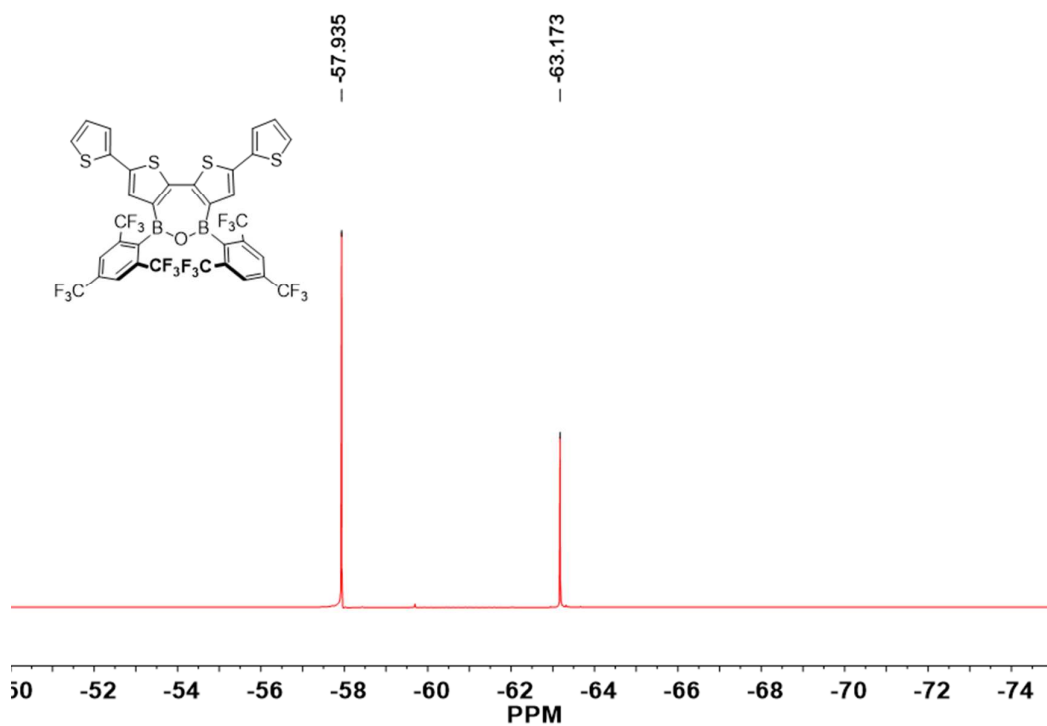

<sup>19</sup>F NMR spectrum of **5B**

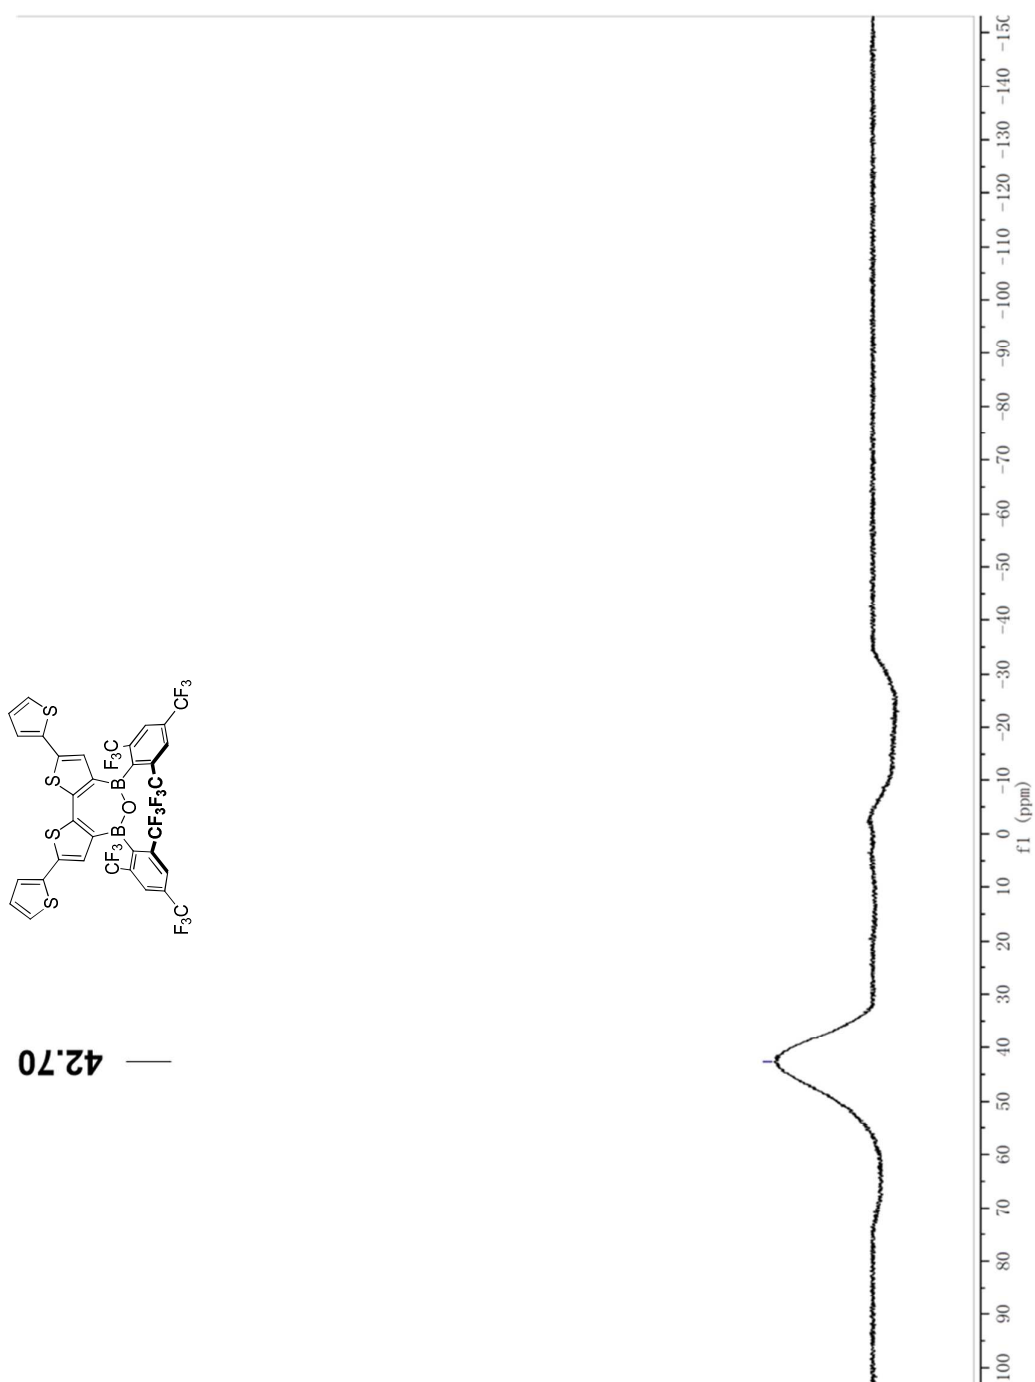

<sup>11</sup>B NMR spectrum of **5B**

Y30151137-8  
20171631 181 (3.017)

TOF MS EI+  
1.88e4

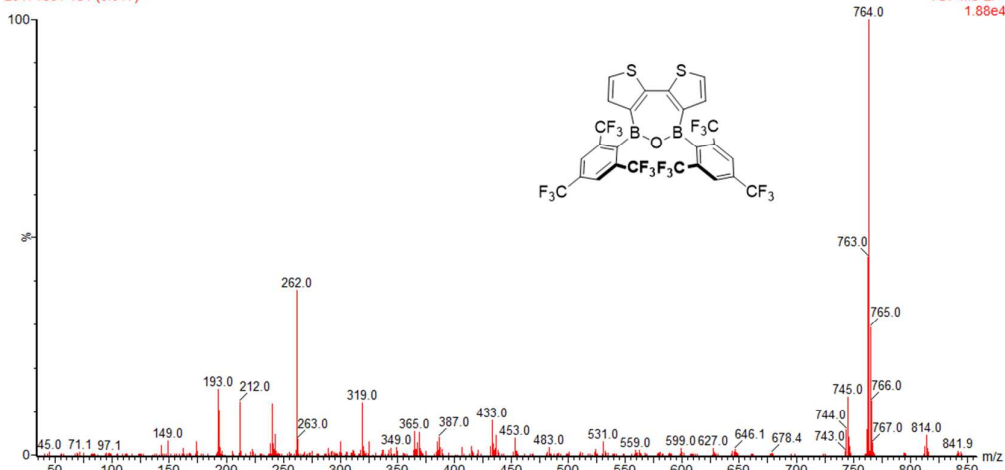

Y30170956-1(4)  
20181085 360 (6.001) Cm (360-(79+92))

Waters GCT Premier

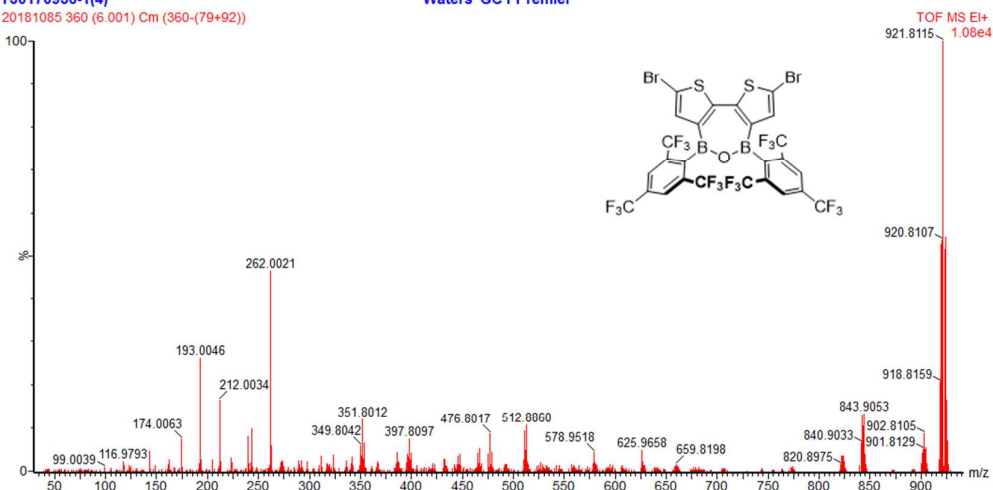

S32



Y30170956-2(5A)

20181086 472 (7.867) Cm (472-(50+57))

Waters GCT Premier

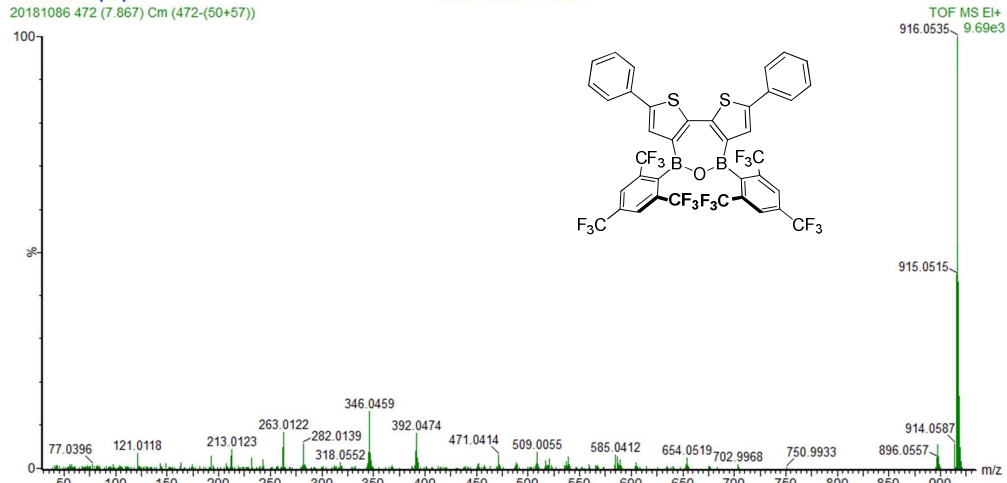

MS of 5A

Y30170956-1(4)

20181085 360 (6.001) Cm (360-(79+92))

Waters GCT Premier

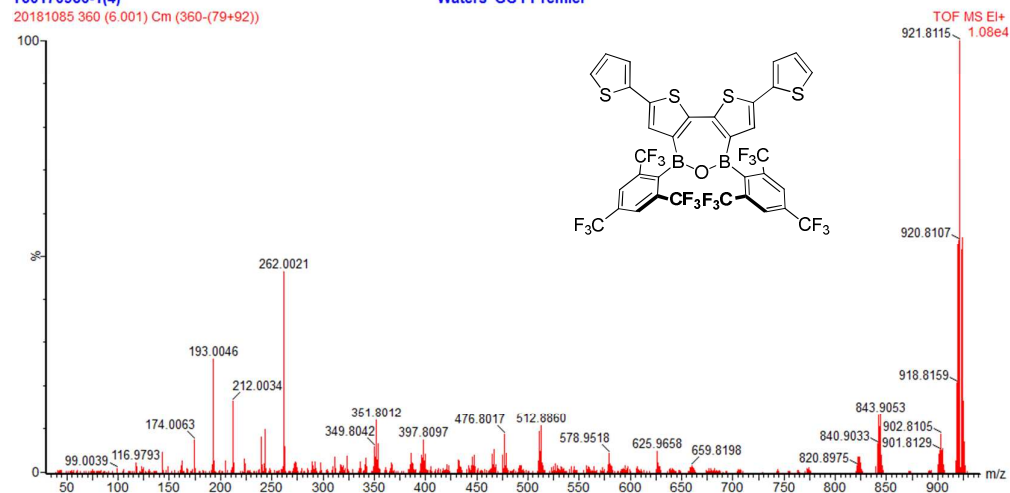

HR-MS of 5B

**References:**

- S1. Frisch, M. J.; Trucks, G. W.; Schlegel, H. B.; Scuseria, G. E.; Robb, M. A.; Cheeseman, J. R.; Scalmani, G.; Barone, V.; Mennucci, B.; Petersson, G. A.; Nakatsuji, H.; Caricato, M.; Li, X.; Hratchian, H. P.; Izmaylov, A. F.; Bloino, J.; Zheng, G.; Sonnenberg, J. L.; Hada, M.; Ehara, M.; Toyota, K.; Fukuda, R.; Hasegawa, J.; Ishida, M.; Nakajima, T.; Honda, Y.; Kitao, O.; Nakai, H.; Vreven, T.; Montgomery, Jr., J. A.; Peralta, J. E.; Ogliaro, F.; Bearpark, M.; Heyd, J. J.; Brothers, E.; Kudin, K. N.; Staroverov, V. N.; Keith, T.; Kobayashi, R.; Normand, J.; Raghavachari, K.; Rendell, A.; Burant, J. C.; Iyengar, S. S.; Tomasi, J.; Cossi, M.; Rega, N.; Millam, J. M.; Klene, M.; Knox, J. E.; Cross, J. B.; Bakken, V.; Adamo, C.; Jaramillo, J.; Gomperts, R.; Stratmann, R. E.; Yazyev, O.; Austin, A. J.; Cammi, R.; Pomelli, C.; Ochterski, J. W.; Martin, R. L.; Morokuma, K.; Zakrzewski, V. G.; Voth, G. A.; Salvador, P.; Dannenberg, J. J.; Dapprich, S.; Daniels, A. D.; Farkas, O.; Foresman, J. B.; Ortiz, J. V.; Cioslowski, J.; Fox, D. J. Gaussian, Inc., *Gaussian 09, Revision D.01*, Wallingford CT, 2013.
- S2. Dennington, R. II ; Keith, T.; Millam, J.; Eppinnett, K.; Hovell, W. L.; Gilliland, R. *GaussView*, Version 3.09; Semichem, Inc.: Shawnee Mission, KS, 2003.
